# Supplementary material for: Yolk-double shell structured bread-like Si@Z-700N@void@C nanocomposites as high stability anodes for lithium-ion batteries
Source: Royal Society of Chemistry journal article supplement (doi:10.1039/d4tc04494k), 2024-12-18
Supplement: d4tc04494k1.pdf [file d4tc04494k1.pdf]

## Supporting Information

# **Yolk-double shell structured bread-like Si@Z-700N@void@C nanocomposites as high-stable anode for lithium-ion batteries**

*Weixiao Dong<sup>a</sup>, Xiaojie Sun<sup>a</sup>, Tuo Zhang<sup>a</sup>, Ping Chen<sup>\*a</sup>*

<sup>a</sup> State Key Laboratory of Fine Chemicals and School of Chemical Engineering, Dalian

University of Technology, Dalian 116024, China

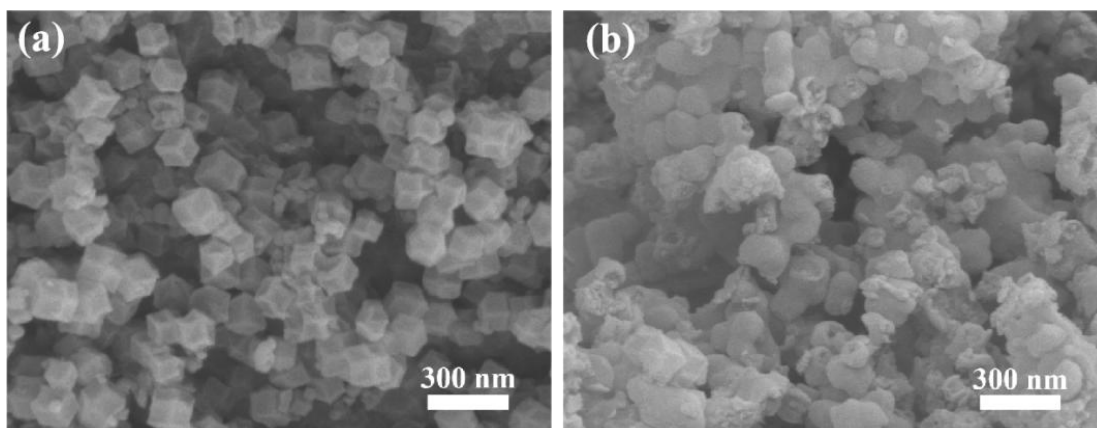

**Figure S1.** SEM images of (a) Si@Z-700N, (b) Si@Z-700N@C.

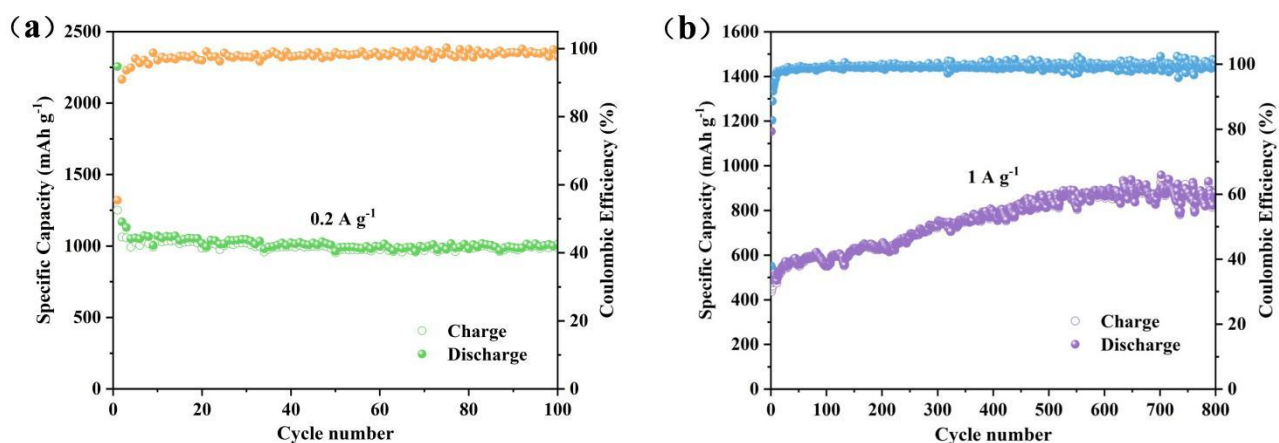

**Fig. S2.** The cycling performance diagram of Si@Z-700N@void@C electrode (a) 100 cycles at 0.2 A g<sup>-1</sup>, (b) 800 cycles at 1 A g<sup>-1</sup>

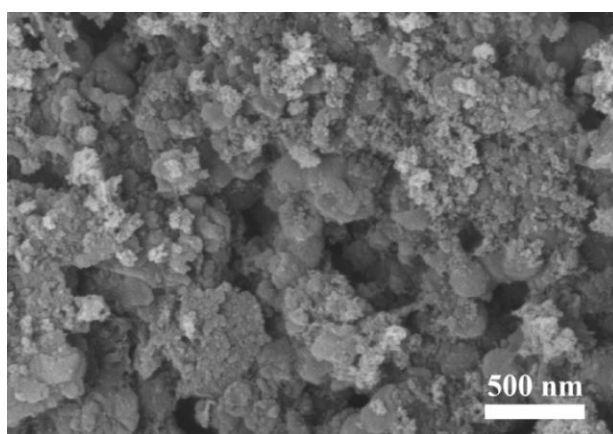

**Fig. S3.** SEM image of Si@Z-700N@void@C composite after 800 cycles at 1 A g<sup>-1</sup>

**Table S1.** Structural parameters of crystalline silicon.

| Samples                     | Average Crystallite Size(nm) | Dislocation density | Lattice Strain(nm <sup>-2</sup> ) |
|-----------------------------|------------------------------|---------------------|-----------------------------------|
| <b>Before carbonization</b> |                              |                     |                                   |
| Si@Z-700N                   | 27.2                         | 0.00164             | 0.00369                           |
| Si@Z-700N@C                 | 27.1                         | 0.00128             | 0.00378                           |
| Si@Z-700N@void@C            | 27.7                         | 0.00134             | 0.00375                           |
| <b>After carbonization</b>  |                              |                     |                                   |
| Si@Z-700N                   | 30.4                         | 0.00182             | 0.00347                           |
| Si@Z-700N@C                 | 30.7                         | 0.00112             | 0.00326                           |
| Si@Z-700N@void@C            | 30.5                         | 0.00149             | 0.00319                           |

**Table S2.** Comparison of Electrochemical Performance of Si/C composites.

| Composites                    | Current density (A g <sup>-1</sup> ) | Cycle number | Capacity after cycles (mAh g <sup>-1</sup> ) | Initial CE(%) | Ref       |
|-------------------------------|--------------------------------------|--------------|----------------------------------------------|---------------|-----------|
| TSC-PDA-B                     | 0.1                                  | 200          | 1113                                         | 71.0          | [1]       |
| hollow Si/SiO <sub>2</sub> @C | 0.5                                  | 200          | 1170                                         | 58.5          | [2]       |
| Si@C@ZIF-67-800N              | 1                                    | 300          | 852                                          | 79.0          | [3]       |
| Si@SiO <sub>2</sub> @NC       | 1                                    | 100          | 641                                          | 81.0          | [4]       |
| Si@GC/PAC                     | 0.1                                  | 200          | 600                                          | 60.2          | [5]       |
| N- Graphene/SiOC              | 1                                    | 1000         | 415                                          | 70.0          | [6]       |
| Si/C-3                        | 0.5                                  | 200          | 571                                          | 70.1          | [7]       |
| Si@Z-700N@void@C              | 1                                    | 800          | 866                                          | 55.4          | this work |

**Table S3.** Impedance parameters of Si@Z-700N, Si@Z-700N@C and Si@Z-700N@void@C electrodes.

| Samples                  | $R_s(\Omega)$ | $R_f(\Omega)$ | $R_{ct}(\Omega)$ | $W_1(\Omega S^{-1/2})$ | CPE1(F) | CPE2(F) |
|--------------------------|---------------|---------------|------------------|------------------------|---------|---------|
| <b>Before cycling</b>    |               |               |                  |                        |         |         |
| Si@Z-700N                | 31.24         |               | 343.4            | 0.3143                 | 2.16E-5 |         |
| Si@Z-700N@C              | 27.57         |               | 173.9            | 0.3249                 | 1.81E-5 |         |
| Si@Z-700N@void@C         | 7.79          |               | 45.4             | 0.3316                 | 1.35E-5 |         |
| <b>After 500th cycle</b> |               |               |                  |                        |         |         |
| Si@Z-700N                | 28.29         | 50.58         | 182.7            | 0.3049                 | 4.32E-6 | 4.47E-5 |
| Si@Z-700N@C              | 20.32         | 49.82         | 48.4             | 0.2815                 | 5.67E-6 | 5.01E-5 |
| Si@Z-700N@void@C         | 6.56          | 34.87         | 21.5             | 0.2186                 | 8.37E-6 | 8.11E-6 |

### References:

- [1] Hu, L.; Luo, B.; Wu, C.; Hu, P.; Wang, L.; Zhang, H. Yolk-shell Si/C composites with multiple Si nanoparticles encapsulated into double carbon shells as lithium-ion battery anodes. *J. Energy Chem.* **2019**, *32*, 124-130.
- [2] Wang, H.; Xu, H.; Jia, K.; Wu, R. ZIF-8-Templated Hollow Cubelike Si/SiO<sub>2</sub>@C Nanocomposites for Superior Lithium Storage Performance. *Acs Appl. Energ. Mater.* **2019**, *2*, 531-538.
- [3] Hu, L.; Luo, B.; Wu, C.; Hu, P.; Wang, L.; Zhang, H. Yolk-shell Si/C composites with multiple Si nanoparticles encapsulated into double carbon shells as lithium-ion battery anodes. *J. Energy Chem.* **2019**, *32*, 124-130.
- [4] Yu, Y.; Zhan, Z.; Xu, Q.; Shen, K. Dual Stabilized Architecture of Si@SiO<sub>2</sub>/N-Doped Carbon Composite Synthesized via Oxygen Plasma Method as Anode for High-performance LIBs. *Chem. Lett.* **2020**, *49*, 423-427.
- [5] Ou, J.; Li, B.; Deng, H.; Li, K.; Wang, H. A carbon-covered silicon material modified by phytic acid with 3D conductive network as anode for lithium-ion batteries. *Adv. Powder Technol.* **2023**, *34*, 103891.
- [6] Naveenkumar, P.; Maniyazagan, M.; Yang, H.; Kang, W. S.; Kim, S. Nitrogen-doped graphene/silicon-oxycarbide nanosphere as composite anode for high-performance lithium-ion batteries. *J. Energy Storage* **2023**, *59*, 106572.
- [7] Zhang, J.; Zuo, S.; Wang, Y.; Yin, H.; Wang, Z.; Wang, J. Scalable synthesis of interconnected hollow Si/C nanospheres enabled by carbon dioxide in magnesiothermic reduction for high-performance lithium energy storage. *J. Power Sources* **2021**, *495*, 229803.
